# Supplementary material
Source: PubMed Central journal article supplement (PMC8240011)
Supplement: jamaneurol-e211910-s001.pdf [file jamaneurol-e211910-s001.pdf]

**Project Title:** Remote Mobile Decision Support System for Nurse Management of Neuromodulation Therapy Phase II

## **2. Investigator(s):**

Michael S. Okun, M.D, PI, Professor Neurology, University of Florida Fixel Institute for Neurological Diseases

Co-I, Adolfo Ramirez-Zamora, MD, Associate Professor, Neurology, Director of Clinical Trials

Co-I, Addie Patterson, MD, Associate Professor, Neurology, University of Florida Fixel Institute for Neurological Diseases

## **Summary**

1 The objective of this application is to prospectively test the use of a mobile deep brain  
2 stimulation (DBS) clinical decision support tool in postoperative clinical care. The central  
3 hypothesis is that the use of a mobile DBS clinical decision support tool for individual  
4 patient management will enable a non-expert DBS programmer to manage a patient's  
5 DBS therapy by using a combination of visits to the patient's home and telemedicine.  
6 This hypothesis was formulated from pilot studies done at the Medical College of  
7 Wisconsin that showed dramatic decreases in DBS programming time compared to  
8 standard care for clinicians who used an iPad-based mobile DBS clinical decision  
9 support tool (greater than 80% time savings). We are currently conducting Phase I of  
10 this study, in which we are prospectively evaluating a mobile DBS clinical decision  
11 support tool to aid expert DBS programmers. The rationale for the proposed research is  
12 that by integrating information already collected from patients, computational models,  
13 clinical informatics, and mobile computing devices, a non-expert can manage DBS  
14 patients.

## **Background**

Computational modeling of DBS has been shown to be a useful way to predict the effects of DBS in individual patients (Butson, Cooper, Henderson, & McIntyre, 2007). This technique uses pre- and post-operative imaging to construct detailed, patient-specific models that predict the electric field and volume of tissue activated (VTA) for each set of stimulation parameters (active DBS contact(s), voltage, pulse width, frequency) (Butson, Maks, & McIntyre, 2006; Butson & McIntyre, 2005, 2006, 2008). The VTA represents the extent of activation of neural tissue based on the assumption that the local stimulation targets are large myelinated axons (McIntyre, Grill, Sherman, & Thakor, 2004; McIntyre, Richardson, & Grill, 2002). These model predictions have been validated in both primate and human studies (Butson et al., 2007; Miocinovic et al., 2009), and the utility of these models has begun to change the approach to DBS programming (Butson, Tamm, Jain, Fogal, & Krueger, 2012; Frankemolle et al., 2010). It has been demonstrated that by

doing retrospective analysis on prior DBS patients, probabilistic maps of stimulation can be generated (Butson et al., 2011).

The second component is a platform that facilitates the delivery and use of these models in a clinical setting. In a recent study with our collaborators we developed ImageVis3D Mobile, an app that provides volume and geometry rendering capabilities on iOS devices (iPhone and iPad) and that builds on the volume rendering system library Tuvok (Fogal & Krueger, 2010). In a collaboration with Dr. Butson, ImageVis3D Mobile was recently adapted to incorporate computational models of DBS, and to provide an interface that is amenable to a clinical workflow in an iPad app (Butson et al., 2012).

We can therefore integrate computational models, probabilistic maps of stimulation, and a iPad application to create a mobile DBS clinical decision support tool that can aid non-experts in the DBS programming process.

### **Specific Aims**

Our central hypothesis is that the use of a mobile DBS clinical decision support tool for individual patient management will enable a non-expert home health nurse to manage the care of a DBS patient. This hypothesis was formulated from pilot studies that showed the efficacy of the mobile DBS clinical support system in aiding expert programmers.

15 We will prospectively test the use of a mobile DBS clinical decision support tool in  
16 postoperative clinical care in the patients' homes. The *rationale* for the proposed  
17 research is that computational models, clinical informatics, and mobile computing  
18 devices can be used to enhance non-expert programmers. This hypothesis will be  
19 tested in *one specific aim*: 1) Measure effectiveness of our mobile DBS clinical decision  
20 support tool in aiding home health nurses to manage DBS patients in their homes.

The primary outcome for Phase II of this study is number of clinic visits for patients during the first 6 months of DBS therapy. For the secondary analysis, we will test for differences in PDQ-39 scores between the two groups.

### **Research Plan Phase II**

#### 21 Enrollment

22 A total of 260 Parkinson's disease patients and their caregivers will be needed in order to  
23 complete the study at the University of Florida during Phase II. Specifically, 130  
24 Parkinson's patients in the standard of care cohort (65 patients/65 caregivers) and 130  
25 Parkinson's patients in the intervention cohort (65 patients/65 caregivers. We anticipate  
26 approximately 10 subjects will withdraw. Participants are not required to have a caregiver  
27 in order to participate in the study.

#### 28 Patients included in the study will meet all of the following Inclusion criteria

- 29 • Age 30-80
- 30 • Planning to receive a DBS device from University of Florida Health as part of  
31 standard of care for Parkinson's disease, or already have a DBS device  
32 implanted by University of Florida Health, but have not yet received DBS

- 33 programming
- 34 • Participants must live in Florida and within 250 miles of the study site.
  - 35 • Patients must be fluent English-speakers

36 Patients will be excluded from the study if

- 37 • Their DBS programming will be conducted by a different other Institution than
- 38 University of Florida Health
- 39 • They have received prior DBS programming
- 40 • They expect to receive an additional DBS lead within 6 months of their initial
- 41 DBS programming session, with the exception of patients initially approved for
- 42 rapid staged or simultaneous bilateral implantation

43

44 Study Procedures

45 Patients will be enrolled either before or after DBS surgery. Patients must be enrolled

46 prior to the first session for DBS programming. Patients will be recruited from the UF

47 Center for Movement Disorders Clinic. Patients will be approached after their DBS

48 Fast Track appointment prior to their DBS Surgery or after their DBS Surgery at their

49 postoperative appointment. The Principal Investigator will identify potential participants

50 in clinic or prior review of the clinic schedule to identify postoperative patients. The

51 Principal Investigator will discuss the protocol with the patient and their

52 caregiver/spouse. The patient will be consented before any protocol related procedures

53 or collection of data commences and documented with a consent note in the source.

54 Participants will be consented in a private clinic room.

55 Randomization

56 Following the DBS operation (lead implantation), patients will be randomized 1:1 to

57 routine clinical programming (65subjects and 65) or to clinical programming assisted by

58 the mobile DBS clinical decision support tool (65 subjects and 65 caregivers).

59 Randomization will be stratified to control for expected variability resulting from different

60 programming nurses, unilateral vs bilateral lead placement and miles (</>100 miles

61 from site).

62 Standard clinical care arm

63 Subjects assigned to the standard clinical care arm will undergo routine clinical

64 programming.

65 Mobile Decision Support arm

66 The patient's MRI and CT scans will be used to generate models for the mobile DBS

67 clinical decision support tool.

68 The DBS programming clinician will use ImageVis3D Mobile app on the iPad to program

69 the DBS system. There is no patent for this app that is available on the Apple App

70 Store. The local study team will de-identify MRI and CT images via Visage and a

71 second user will validate the images are de-identified before sending them to Utah. A

72 patient study code will be assigned by the local study team. The images will be

73 transferred to the University of Utah, where a patient specific computational model will  
74 be generated. The models will be transferred back to the clinician's iPad for use. The  
75 patients will be assessed according to the standard clinic schedule for routine care.

76 Patients in the intervention arm will be seen in the clinic at baseline (DBS battery  
77 placement preoperative appointment) and month 6. Patients will be visited in their  
78 homes at month 1 (device activation) and month 3. The patient will have month 2,4, and  
79 5 visits either over the phone or a video call.

80 For visits in the patient's home, the nurse will bring the clinical DBS programmer with  
81 them to conduct programming. The nurse will leave the patient with multiple DBS  
82 settings that they can access via the patient programmer. For the visits that are  
83 conducted via phone/video, the nurse will direct the patient to make changes with their  
84 patient programmer. After the phone/video call visits, we will ask patients and their  
85 caregivers to fill out a short survey asking about the their satisfaction with the virtual visit  
86 (Provider Virtual Visit Survey and Virtual Visit Survey). The nurse will be aided by the  
87 mobile DBS clinical decision support tool during all DBS programming. At any point if  
88 the patient feels that they need additional in home visits, or need to visit an expert in the  
89 clinic, they can schedule an appointment.

#### 90 Both Clinical and Intervention Arms

91 Programming sessions will be conducted during the month 1,2,3,4 and 5 visits.  
92 Programming adjustments may also occur at month 6 if needed, but will occur after  
93 study procedures are finished.

94 We will measure the time spent on DBS programming for patients in each group. We  
95 will capture total time spent on DBS programming as well as number of programming  
96 sessions. We will compare total time spent programming for the standard care versus  
97 the intervention group for each session over 6 months. We will also capture the DBS  
98 settings that are selected for the patient during each visit.

#### 99 Neurological Evaluation

100 Patients will be assessed using the Unified Parkinson's Disease Rating Scale (UPDRS)  
101 at baseline, month 3 and month 6 (off medication). This assessment may be videotaped  
102 in order to facilitate independent review of the rating assessment. If a participant  
103 chooses not to be video recorded, or video recording is not available at the site, an  
104 independent, clinically trained rater may conduct the assessment in real time.

#### 105 Patient-Reported Outcomes

We will capture patient-reported quality of life (QOL) using the PDQ-39. The PDQ-39 is a validated, and a widely used scale completed by the patient, and is used to assess health-related quality of life in patients with Parkinson's disease. ~~and DBS~~. Patients will fill out rating scales using a web-based form on an iPad, over the phone or video call, or on paper before designated programming sessions. We will collect PDQ-39 at baseline, month 3, and month 6.

106 We will collect the Multidimensional Caregiver Strain Index (MCSI) at baseline, month  
 107 3 and month 6. The caregiver will report on the financial and time burden of the clinical  
 108 visit. If the patient does not have a consented caregiver, we will collect this information  
 109 from the patient. It is acceptable for either the patient or the caregiver to complete the  
 110 survey, but it is preferable that the same person fill it out each time. Additionally along  
 111 with the MCSI we will collect an accompanying questionnaire called the Patient  
 112 Assessment of Care in Chronic Illness which will help us to interpret the MCSI.

113 Schedule of Assessments –Mobile Decision Support

| NAME or Short Description of Item, Service, Activity                    | Screening (Fast Track up to IPG Implant) | Baseline (Preoperative IPG appointment) | Month 1 post-op home | Month 2 (30+/- 7 days from baseline) phone/video | Month 3 (60+/- 7 days from baseline) home | Month 4 (90+/- 7 days from baseline) phone/video | Month 5 (120+/- 7 days from baseline) phone/video | Month 6 (150+/- 7 days from baseline) |
|-------------------------------------------------------------------------|------------------------------------------|-----------------------------------------|----------------------|--------------------------------------------------|-------------------------------------------|--------------------------------------------------|---------------------------------------------------|---------------------------------------|
| Informed Consent                                                        | x                                        |                                         |                      |                                                  |                                           |                                                  |                                                   |                                       |
| Medical History (including past UPDRS scores)                           | x                                        | x                                       |                      |                                                  |                                           |                                                  |                                                   |                                       |
| Demographics                                                            | x                                        | x                                       |                      |                                                  |                                           |                                                  |                                                   |                                       |
| Preparation of Decision Support System (depending on patient condition) |                                          | x                                       |                      |                                                  |                                           |                                                  |                                                   |                                       |
| Randomization                                                           | x                                        | x                                       |                      |                                                  |                                           |                                                  |                                                   |                                       |
| All UPDRS III scoring by Blinded Rater                                  | x                                        |                                         |                      |                                                  | x                                         |                                                  |                                                   | x                                     |
| UPDRS III On Medication/On Stimulation                                  |                                          |                                         |                      |                                                  |                                           |                                                  |                                                   | x                                     |
| UPDRS III Off Medication/On Stimulation (videotaped)                    | x (no stimulation)                       |                                         |                      |                                                  | x                                         |                                                  |                                                   | x                                     |
| UPDRS I, II, and IV                                                     |                                          | x                                       |                      |                                                  | x                                         |                                                  |                                                   | x                                     |
| PDQ-39 and visit burden report                                          | x*                                       | x*                                      |                      |                                                  | x                                         |                                                  |                                                   | x                                     |
| DBS Programming Session (record settings and time spent programming)    |                                          |                                         | x                    | x                                                | x                                         | x                                                | x                                                 |                                       |
| Caregiver MCSI and report of time spent caregiving (if applicable)      |                                          | x                                       |                      |                                                  | x                                         |                                                  |                                                   | x                                     |
| Patient Assessment of Care in Chronic Illness                           |                                          | x                                       |                      |                                                  | x                                         |                                                  |                                                   | x                                     |
| Telemedicine Visit Satisfaction Survey (intervention arm only)          |                                          |                                         |                      | x                                                |                                           | x                                                | x                                                 |                                       |
| Adverse Event and Concomitant Medication recording                      | x                                        | x                                       | x                    | x                                                | x                                         | x                                                | x                                                 | x                                     |

\*If PDQ was performed as part of SOC within 3 month of the IPG implant, it will be obtained during screening from the EMR. If not, it will be performed at Baseline visit.

114

Schedule of Assessments – Clinical Arm

| NAME or Short Description of Item, Service, Activity                       | Screening (Fast Track up to IPG Implant) | Baseline (Preoperative IPG appointment) | (Month 1 post-op) | Month 2 (30+/- 7 days from baseline) | Month 3 (60+/- 7 days from baseline) | Month 4 (90+/- 7 days from baseline) | Month 5 (120+/- 7 days from baseline) | Month 6 (150+/- 7 days from baseline) |
|----------------------------------------------------------------------------|------------------------------------------|-----------------------------------------|-------------------|--------------------------------------|--------------------------------------|--------------------------------------|---------------------------------------|---------------------------------------|
| Informed Consent                                                           | x                                        |                                         |                   |                                      |                                      |                                      |                                       |                                       |
| Medical History (including past UPDRS scores)                              | x                                        | x                                       |                   |                                      |                                      |                                      |                                       |                                       |
| Demographics                                                               | x                                        | x                                       |                   |                                      |                                      |                                      |                                       |                                       |
| Preparation of Decision Support System (depending on patient condition)    |                                          | x                                       |                   |                                      |                                      |                                      |                                       |                                       |
| Randomization                                                              | x                                        |                                         |                   |                                      |                                      |                                      |                                       |                                       |
| All UPDRS III scoring by Blinded Rater                                     |                                          | x                                       |                   |                                      |                                      |                                      |                                       | x                                     |
| UPDRS III On Medication/On Stimulation                                     |                                          |                                         |                   |                                      |                                      |                                      |                                       | x                                     |
| UPDRS III Off Medication/On Stimulation (videotaped)                       | x (no stimulation)                       |                                         |                   |                                      | x                                    |                                      |                                       | x                                     |
| UPDRS I, II, and IV                                                        |                                          | x                                       |                   |                                      | x                                    |                                      |                                       | x                                     |
| PDQ-39 and visit burden report (repeat if not done within 3 months of IPG) |                                          | x                                       |                   |                                      | x                                    |                                      |                                       | x                                     |
| DBS Programming Session (record settings and time spent programming)       |                                          |                                         | x                 | x                                    | x                                    | x                                    | x                                     |                                       |
| Caregiver MCSI and report of time spent caregiving (if applicable)         |                                          | x                                       |                   |                                      | x                                    |                                      |                                       | x                                     |
| Adverse Event and Concomitant Medication recording                         |                                          |                                         | x                 | x                                    | x                                    | x                                    | x                                     | x                                     |

115 Programming IPads with Decision Support Software will be locked in a room here at the  
 116 Center for Movement Disorders. Confidential computer-based files will only be made  
 117 available to personnel involved in the study through the use of access privileges,  
 118 passwords and encryption. Passwords and encryption are used to ensure that the  
 119 electronic data is secure and housed in a locked room. Paper based files will be stored  
 120 in a locked cabinet in a research room in the Center for Movement Disorders. This  
 121 room is locked and only accessible to research personnel. Videos will be downloaded  
 122 onto a password protected computer and stored on a restricted drive. The videos will  
 123 only be accessed by a research personnel and will be destroyed at the end of the study.

**Possible Benefits:**

124 Participants and caregivers may or may not personally benefit from participating in this  
125 study. There is the possibility for that the patient may have to make fewer visits to the  
126 clinic for their DBS therapy to be managed.

127  
128 The information obtained from this study may help improve the treatment of Parkinson's  
129 disease and DBS patients in the future.

130

### 131 **Possible Discomforts and Risks:**

132 The risks associated with this study will be explained to all participants, they will be  
133 shared in writing for the subject to review prior to participation. Expected outcomes  
134 from the stimulation patterns include the following side effects (e.g. feeling of tightness  
135 or pulling, sensory changes (reported as heaviness, numbness or tingling) or visual  
136 changes. These symptoms typically occur as part of standard clinic programming visits  
137 and are stimulation-induced, often transient and can be stopped immediately by turning  
138 the device off or to a lower setting as well as by returning the device to its normal home  
139 settings. For home visits, the home nurse will be with the subjects throughout the study  
140 to assess side effects. Should the subjects experience a side effect that is intolerable,  
141 the nurse will immediately stop the stimulation and turn the device off or turn it to the  
142 regular home setting. This is the same procedure that happens in clinic as part of  
143 standard of care. The nurse will then contact the PI or Co-investigators for further  
144 instruction. Any adverse events will be reported to the local UF IRB-01 according to  
145 reporting requirements.

146

147

### 148 **Safety Monitoring and Reporting**

149 Participants in both groups will be monitored for adverse events at each programming  
150 visit, and reportable events will be relayed to the lead clinical PI, Dr. Okun and the IRB.  
151 During a remote or home programming session, should the participant feel any  
152 discomfort or experience an adverse side effect, programming will be stopped  
153 immediately and the nurse will call the PI or Co-investigators.

154

155 This study will have a designated **Data Safety Monitoring Board (DSMB)** composed of  
156 five members (three neurologist, a statistician, and a non-neurological physician)  
157 without any ties to the current study or conflict of interest. The safety experience will be  
158 reviewed approximately every 6 months by the DSMB via email or telephone. This will  
159 start when the first patient is enrolled and end when the last patient completes the  
160 primary outcome. The DSMB will be informed of all serious adverse events and all mild  
161 adverse events which are potentially related to programming. The DSMB will designate  
162 each AE as mild or severe; as related, uncertain to be related or not related; and as  
163 anticipated or unanticipated. The DSMB has the authority to suspend further enrollment  
164 pending investigation of safety concerns raised by SAEs occurring in the trial.

### **Data Sharing and Storage**

165 Images are transferred to and stored in the University of Utah Protected Environment, which  
166 is specifically approved to store identified human data. Images can be transferred in one of  
167 two ways:  
168 1. PowerShare using under the existing agreement with University of Utah and University of  
169 Florida.  
170 2. Secure File Transfer Protocol (sftp) in combination with two factor authentication using  
171 Duo.

All data captured for the study will be de-identified using unique study IDs and be stored using REDCap at the University of Utah. Research personnel will be assigned a username and password specific to the study in REDCap. No PHI will be transmitted to or stored on the iPad.

### **Analysis Plan**

172 The primary outcome, number of clinic visits, will be evaluated we will use a Wilcoxon-  
173 Mann-Whitney test. With projected enrollment we will have 80% power to detect a  
174 difference between the control and experimental groups. For the secondary analysis,  
175 PDQ-39 scores will be aggregated into a time-weighted average score using a  
176 trapezoid-rule based area under the curve (AUC) calculation. This estimate of the  
177 overall QOL over the 6 month follow-up period will be compared using randomized  
178 block ANCOVA adjusting for the baseline PDQ-39 score. Finally, for a tertiary analysis,  
179 6-month PDQ-39 overall and subscale scores, and UPDRS scores will be compared  
180 using the same method.

### **Patient Withdrawals**

182 A participant may be removed from the study at the investigator's discretion. Subjects  
183 who withdraw or are withdrawn prematurely from the study will not be replaced.

### **Discontinuation of Study**

185 The study may be discontinued at any time for any reason by the NIH, IRB or Lead  
186 Investigator prior to the completion of enrollment and follow-up for all participants.

### **Study Costs and Payments**

188 Participants will not be charged or paid to participate in this study.  
189

### **REFERENCES**

191 Butson, C. R., Cooper, S. E., Henderson, J. M., & McIntyre, C. C. (2007). Patient-  
192 specific analysis of the volume of tissue activated during deep brain stimulation.  
193 *NeuroImage*, 34(2), 661–70. doi:10.1016/j.neuroimage.2006.09.034<sup>[L]</sup><sub>[SEP]</sub>

194 Butson, C. R., Cooper, S. E., Henderson, J. M., Wolgamuth, B., & McIntyre, C. C.  
195 (2011). Probabilistic analysis of activation volumes generated during deep brain  
196 stimulation. *Neuroimage*, 54(3), 2096-2104. doi:10.1016/j.neuroimage.2010.10.059  
197

198 Butson, C. R., Maks, C. B., & McIntyre, C. C. (2006). Sources and effects of electrode  
199 impedance during deep brain stimulation. *Clinical neurophysiology : official journal of*

200 *the International Federation of Clinical Neurophysiology*, 117(2), 447–54.  
201 doi:10.1016/j.clinph.2005.10.007<sup>[SEP]</sup>

202 Butson, C. R., & McIntyre, C. C. (2005). Tissue and electrode capacitance reduce  
203 neural activation volumes during deep brain stimulation. *Clinical neurophysiology :  
204 official journal of the International Federation of Clinical Neurophysiology*, 116(10),  
205 2490–500. doi:10.1016/j.clinph.2005.06.023<sup>[SEP]</sup>

206 Butson, C. R., & McIntyre, C. C. (2006). Role of electrode design on the volume of  
207 tissue activated during deep brain stimulation. *Journal of neural engineering*, 3(1), 1–8.  
208 doi:10.1088/1741-2560/3/1/001<sup>[SEP]</sup>

209 Butson, C. R., & McIntyre, C. C. (2008). Current Steering to Control the Volume of  
210 Tissue Activated During Deep Brain Stimulation. *Brain stimulation*, 1(1), 7–15.  
211 doi:10.1016/j.brs.2007.08.004<sup>[SEP]</sup>

212 Butson, C. R., Tamm, G., Jain, S., Fogal, T., & Krueger, J. (2012). Evaluation of  
213 Interactive Visualization on Mobile Computing Platforms for Selection of Deep Brain  
214 Stimulation Parameters. *IEEE Transactions on Visualization and Computer Graphics*, In  
215 Press.<sup>[SEP]</sup>

216 Fogal, T., & Krueger, J. (2010). Tuvok - an architecture for large scale volume  
217 rendering. *Proceedings of the 15th Vision, Modeling and Visualization Workshop*.<sup>[SEP]</sup>

218 Frankemolle, A. M. M., Wu, J., Noecker, A. M., Voelcker-Rehage, C., Ho, J. C., Vitek, J.  
219 L., McIntyre, C. C., et al. (2010). Reversing cognitive-motor impairments in Parkinson's  
220 disease patients using a computational modelling approach to deep brain stimulation  
221 programming. *Brain : a journal of neurology*, 133(Pt 3), 746– 61.  
222 doi:10.1093/brain/awp315

223 Jenkinson, C., Peto, V., Fitzpatrick, R., Greenhall, R., & Hyman, N. (1995). Self-  
224 reported functioning and well- being in patients with Parkinson's disease: comparison of  
225 the short-form health survey (SF-36) and the Parkinson's Disease Questionnaire (PDQ-  
226 39). *Age and ageing*, 24(6), 505–9.

227 McIntyre, C. C., Grill, W. M., Sherman, D. L., & Thakor, N. V. (2004). Cellular effects of  
228 deep brain stimulation: model-based analysis of activation and inhibition. *Journal of  
229 neurophysiology*, 91(4), 1457–69. doi:10.1152/jn.00989.2003

230 McIntyre, C. C., Richardson, A. G., & Grill, W. M. (2002). Modeling the excitability of  
231 mammalian nerve fibers: influence of afterpotentials on the recovery cycle. *Journal of  
232 neurophysiology*, 87(2), 995–1006.

233 Miocinovic, S., Lempka, S. F., Russo, G. S., Maks, C. B., Butson, C. R., Sakaie, K. E.,  
234 Vitek, J. L., et al. (2009). Experimental and theoretical characterization of the voltage  
235 distribution generated by deep brain stimulation. *Experimental neurology*, 216(1), 166–  
236 76. doi:10.1016/j.expneurol.2008.11.024  
237

238 Stull, D. (1996). The multidimensional caregiver strain index (MCSI): its measurement  
239 and structure. *J Clin Geropsychology*, 2, 175–96.

240

241
