# Supplementary material
Source: PubMed Central journal article supplement (PMC8240011)
Supplement: jamaneurol-e211910-s003.pdf [file jamaneurol-e211910-s003.pdf]

Duffley. Home health management of Parkinson disease deep brain stimulation: a randomized clinical trial. *JAMA Neurol*. Published online June 28, 2021. doi:10.1001/jamaneurol.2021.1910

## Data Sharing Statement

### Data

**Data available:** Yes

**Data types:** Deidentified participant data

**How to access data:** <https://neuromodulationregistry.org/>

**When available:** With publication

### Supporting Documents

**Document types:** None

### Additional Information

**Who can access the data:** Researchers whose proposed use of the data has been approved

**Types of analyses:** For a specified purpose

**Mechanisms of data availability:** With a signed data access agreement
